# Supplementary material
Source: HighWire-hosted journal article supplement (https://bmjopen.bmj.com/content/15/3/e087128)
Supplement: inline-supplementary-material-14 [file inline-supplementary-material-14.pdf]

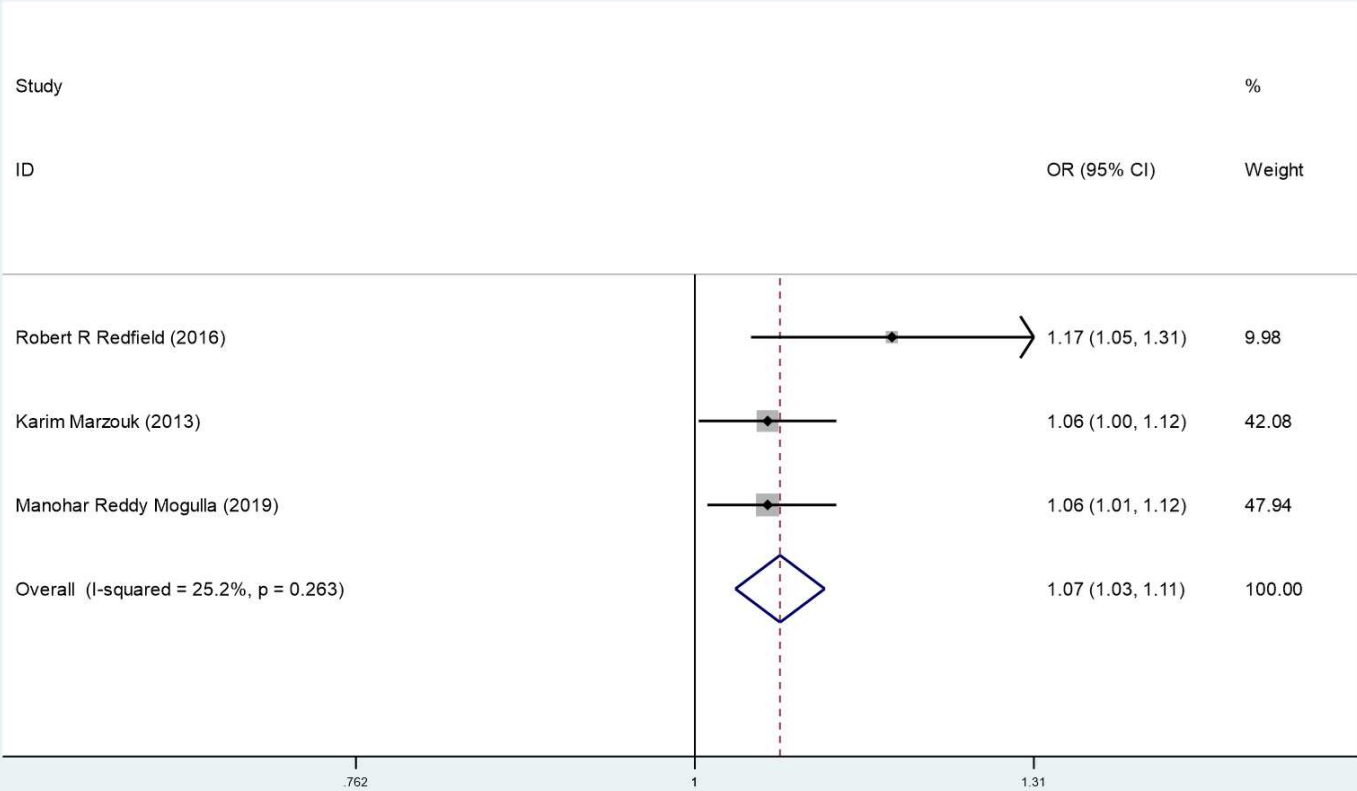

| Study                        | ES    | [95% Conf. Interval] |       | % Weight |
|------------------------------|-------|----------------------|-------|----------|
| Robert R Redfield (2016)     | 1.171 | 1.046                | 1.312 | 9.98     |
| Karim Marzouk (2013)         | 1.060 | 1.003                | 1.120 | 42.08    |
| Manohar Reddy Mogulla (2019) | 1.060 | 1.010                | 1.120 | 47.94    |
| I-V pooled ES                | 1.071 | 1.033                | 1.110 | 100.00   |

Heterogeneity calculated by formula

$$Q = \sum_i \{ (1/\text{variance}_i) * (\text{effect}_i - \text{effect\_pooled})^2 \}$$

where  $\text{variance}_i = ((\text{upper limit} - \text{lower limit}) / (2 * z))^2$

Heterogeneity chi-squared = 2.67 (d.f. = 2) p = 0.263

I-squared (variation in ES attributable to heterogeneity) = 25.2%

Test of ES=1 : z= 3.74 p = 0.000
