# Supplementary material
Source: HighWire-hosted journal article supplement (https://bmjopen.bmj.com/content/15/3/e087128)

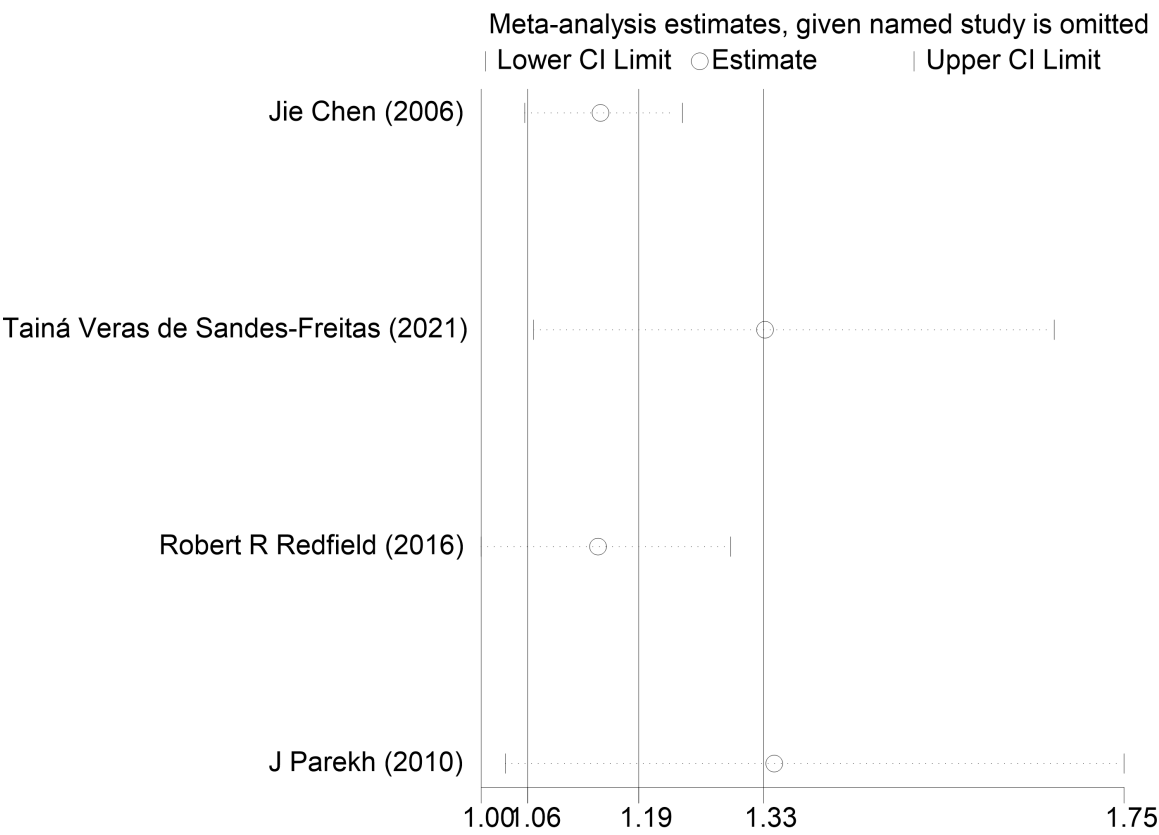

Supplement: inline-supplementary-material-10 [file inline-supplementary-material-10.pdf]
